# Supplementary material
Source: Springer Nature journal article supplement (https://www.springermedizin.de/resource/supplementary/12885_2012_3812_MOESM8_ESM.pdf/9464510)

**+24 hours**

**+48 hours**

**+72 hours**

**0%  
FLC**

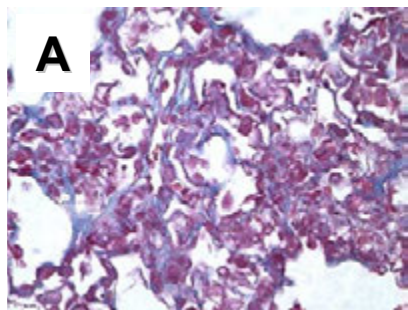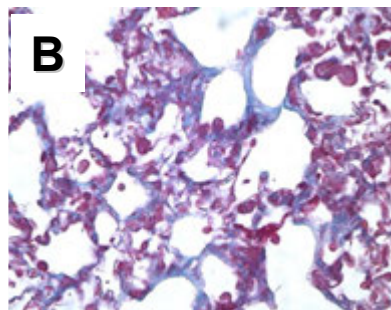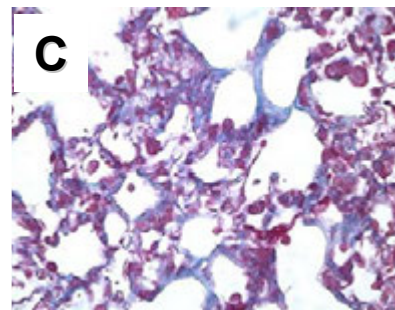

**10%  
FLC**

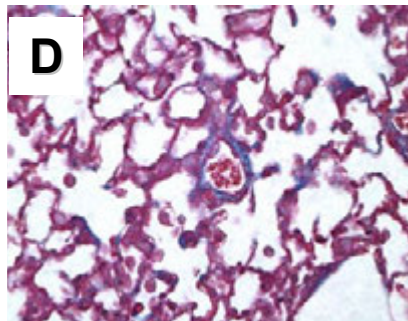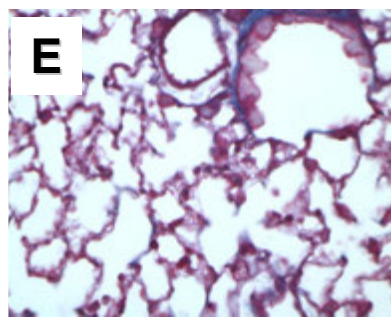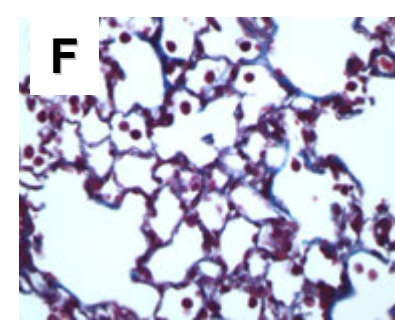

**20%  
FLC**

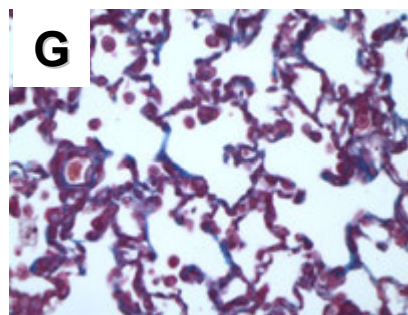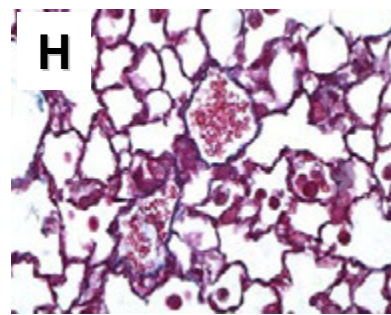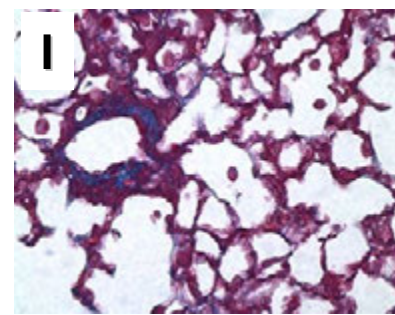

Supplement: MOESM8 [file 9464510]
